# Supplementary material
Source: publisher site journal article supplement (https://www.spandidos-publications.com/1543/downloadSupplementary)
Supplement: Supplementary file 1 [file downloadSupplementary]

## Sheet: Table SI
Table SI. Primer sequences
Primer	Sequences（5'→3'）
BCL2L1 forward	TGCGTGGAAAGCGTAGA
BCL2L1 reverse	GTGAGCCCAGCAGAACC
BIRC3 forward	ATGCCAAGTGGTTTCC
BIRC3 reverse	CATCTCCTGGGCTGTC
CAPN2 forward	AGCCATTGCCTCCCTCAC
CAPN2 reverse	TCCACCCACTCGCCGTA
CCL2 forward	CTTCTGTGCCTGCTGCTC
CCL2 reverse	TGCTGCTGGTGATTCTTCT
COL1A1 forward	CGGCTCCTGCTCCTCTTAG
COL1A1 reverse	TGGTCGGTGGGTGACTCTG
COL4A1 forward	GAAAGGGCTTCAGGGACT
COL4A1 reverse	AAGGACACTGTGGGTCATCT
COL4A6 forward	GGATTGCCAGCATTATCAG
COL4A6 reverse	CACCGTCACAAGCACAGA
CSF1 forward	CTGCGTCCGAACTTTCTATG
CSF1 reverse	CACTGCTAGGGATGGCTTT
CXCL1 forward	TGGCACTGCTGCTCCTG
CXCL1 reverse	GGCTATGACTTCGGTTTGG
CXCL2 forward	CCAGTGCTTGCAGACCCT
CXCL2 reverse	TCAGTTGGATTTGCCATTTT
CXCL3 forward	AGGAGCGTCCGTGGTCA
CXCL3 reverse	GGGATGCGGGGTTGAG
EPHA2 forward	CTGCTTCGCCCTGCTGT
EPHA2 reverse	TCCCACCCTTTGCCATAC
FGFR1 forward	CCCAGACAACCTGCCTTAT
FGFR1 reverse	GTAGACGATGACCGACCC
FN1 forward	GTGGAGGCACTGAAAGAC
FN1 reverse	CGGCATAATGGGAAACT
ICAM1 forward	GGAGCCAATTTCTCGTGC
ICAM1 reverse	GGAGTCGTTGCCATAGGTG
IL1B forward	CTCGCCAGTGAAATGAT
IL1B reverse	AAGCCCTTGCTGTAGTG
IL4R forward	ACGTGGTCAGTGCGGATAA
IL4R reverse	GATGCGGAGGGAGGGTT
IL6 forward	TGAGGAACAAGCCAGAGC
IL6 reverse	ACATTTGCCGAAGAGCC
IL7R forward	GATTAAGCCTATCGTATGG
IL7R reverse	TCCTCAGATGGGCAGTT
LAMA1 forward	ATGGGAACCCTCAAACA
LAMA1 reverse	GAAAGAACGGCATCACC
LAMA4 forward	TCGGTTCTGCCTCTGTG
LAMA4 reverse	TATCCTGAGCCGTCCAA
LAMB1 forward	ACACCTCCTCTGATAGCG
LAMB1 reverse	TCTCCTGAACCTCCCAC
LAMB3 forward	CGCTCCCTTCGGCTTAT
LAMB3 reverse	TGCTCGCTGGCACCTTC
LAMC1 forward	GCTGTAAGCCAGGAGTGAT
LAMC1 reverse	TCTATGCTGCCAGAGGGA
PTGS2 forward	CGAGGTGTATGTATGAGTGT
PTGS2 reverse	AGTGGGTAAGTATGTAGTGC
ITGA1 forward	TGGTTACCCTGTGCTGT
ITGA1 reverse	CACTCCGAAGTTCTCCC
ITGA2 forward	TGTGGTGAGGACGGACTTTG
ITGA2 reverse	CAGGGTAGCCTACATCGCAG
ITGA3 forward	CTGGGACTGCCTGGGTT
ITGA3 reverse	AGGTCTTGTGGACGATGTTG
ITGA5 forward	GACCCAGCAGGGAGTAGTGT
ITGA5 reverse	AAGGGCAGAGCCAAAGAA
ITGB4 forward	CCACCAGCAGTCGCTCTAC
ITGB4 reverse	CAGTCGTCATCCTCGTCCC
ITGB5 forward	CATCCCTTGCCTTGCTTG
ITGB5 reverse	AATCTCCACCGTTGTTCC
JAG1 forward	CCTCCTGTCGGGATTTG
JAG1 reverse	GCACTGGGCACCGTTCT
JUNB forward	GAGCTGGAACGCCTGATTGT
JUNB reverse	TGATGGTGGTCGTCGGGTA
LIF forward	GCCAACGGCACGGAGAA
LIF reverse	TTGCTGTGGAGGCTGAGGG
OSMR forward	AATGTCATCTGGGTGGG
OSMR reverse	AATTTGGCTCAGGGAAC
PDGFB forward	TCTGCTGCTACCTGCGTCTG
PDGFB reverse	GCGTTGGTGCGGTCTATG
SDC4 forward	CTGGCAGCTCTGATTGTG
SDC4 reverse	GCTTTCTTGTAGATGGGTTTC
TNC forward	CGCTGAGGTTGATGTTCC
TNC reverse	TGGCTGCGTTGATGGTC
TNFAIP3 forward	GTCACCAGCGTTCCAAGTC
TNFAIP3 reverse	CCTGAGGCAGCAGCAAA
VASP forward	AAGGAAAGCCACGCAAGTT
VASP reverse	CACCCTCTGTAGGTCCGAGTAA
BMF forward	GCTGGCTATCGGCTTCC
BMF reverse	GGTTCTGCTGGTGTTGCTG
PDCD4 forward	GATACTGAATGTAAACCCTG
PDCD4 reverse	TGACCGAATCGCCTCT
EIF4B forward	CTGGGCTGATGAAACGG
EIF4B reverse	GTGGGAAGGATGGAACG
CPT1A forward	TCAATCGGACTCTGGAAAC
CPT1A reverse	GGTGGCACGACTCATCTT
SLC25A6 forward	CCCCACTCAAGCCCTCAA
SLC25A6 reverse	CAGCGGGTACACGAAGCA
MLTK forward	GAGTGGAGGTGCGAAAT
MLTK reverse	GCTGAACCCAACAATACA
FAM83A forward	TCATCATCTCGGACTGGA
FAM83A reverse	GCTTGGAGGAGGCGTA
GAPDH forward	CTTCCAGGAGCGAGAT
GAPDH reverse	CCTTCCACGATACCAA
